# Supplementary material for: Multi-epitope Antigen for Specific Serological Detection of Dengue Viruses
Source: MDPI journal article supplement (doi:10.3390/v15091936), 2023-09-16
Supplement: s1 [file s1]

# Multi-epitope Antigen for Specific Serological Detection of Dengue Viruses

Samuel Santos Pereira, Robert Andreato Santos, Maria Fernanda de Castro-Amarante, Aléxia Adrienne Venceslau-Carvalho, Natiely Silva Sales, Mariângela de Oliveira Silva, Rúbens Prince dos Santos Alves, Patrícia Jungmann, Luís Carlos de Souza Ferreira\*

\* Correspondence: lcsf@usp.br

## 1 Supplementary table

**TABLE S1.** Absorbance in the T- $\Delta$ NS1-based DENV IgG and  $\Delta$ NS1-based DENV IgG ELISAs

| Sample ID* | ELISA test         |                       | Sample ID | ELISA test         |                       |
|------------|--------------------|-----------------------|-----------|--------------------|-----------------------|
|            | $\Delta$ NS1-based | T- $\Delta$ NS1-based |           | $\Delta$ NS1-based | T- $\Delta$ NS1-based |
| 01         | 2,6795             | 1,5835                | 52        | 0,09               | 0,194                 |
| 02         | 0,9115             | 0,4745                | 53        | 0,285              | 0,3385                |
| 03         | 1,0085             | 0,8885                | 54        | 0,193              | 0,6025                |
| 04         | 0,924              | 0,524                 | 55        | 0,243              | 0,378                 |
| 05         | 0,512              | 0,3105                | 56        | 0,2045             | 0,513                 |
| 06         | 1,563              | 1,3095                | 57        | 0,155              | 0,429                 |
| 07         | 1,606              | 0,772                 | 58        | 0,1365             | 0,4525                |
| 08         | 1,3345             | 0,8525                | 59        | 0,1035             | 0,3255                |
| 09         | 3,312              | 1,569                 | 60        | 0,225              | 0,256                 |
| 10         | 0,961              | 1,6735                | 61        | 0,1595             | 0,3115                |
| 11         | 2,0445             | 1,0105                | 62        | 0,103              | 0,469                 |
| 12         | 1,811              | 1,0055                | 63        | 0,1735             | 0,282                 |
| 13         | 2,507              | 1,67                  | 64        | 0,219              | 0,453                 |
| 14         | 3,781              | 2,0525                | 65        | 0,167              | 0,5205                |
| 15         | 0,6015             | 0,2435                | 66        | 0,164              | 0,66                  |
| 16         | 1,059              | 0,299                 | 67        | 0,2585             | 0,47                  |
| 17         | 3,164              | 1,0835                | 68        | 0,1005             | 0,143                 |
| 18         | 4                  | 3,106                 | 69        | 0,135              | 0,227                 |
| 19         | 4                  | 2,986                 | 70        | 0,1565             | 0,1885                |
| 20         | 1,7725             | 0,445                 | 71        | 0,3165             | 0,2875                |
| 21         | 0,5035             | 0,549                 | 72        | 0,1235             | 0,141                 |
| 22         | 2,506              | 1,0255                | 73        | 0,148              | 0,5055                |
| 23         | 0,5075             | 0,523                 | 74        | 0,197              | 0,2965                |
| 24         | 2,5085             | 1,156                 | 75        | 0,1165             | 0,1325                |
| 25         | 1,5945             | 0,616                 | 76        | 0,1545             | 0,2515                |
| 26         | 0,9115             | 0,716                 | 77        | 0,095              | 0,156                 |
| 27         | 0,7065             | 0,437                 | 78        | 0,219              | 0,3755                |
| 28         | 0,618              | 0,4295                | 79        | 0,151              | 0,372                 |

## Supplementary Material

|           |        |        |            |        |         |
|-----------|--------|--------|------------|--------|---------|
| <b>29</b> | 1,823  | 0,8965 | <b>80</b>  | 0,2375 | 0,3015  |
| <b>30</b> | 0,704  | 0,365  | <b>81</b>  | 0,2255 | 0,3085  |
| <b>31</b> | 1,091  | 0,7225 | <b>82</b>  | 0,2505 | 0,348   |
| <b>32</b> | 2,8175 | 1,218  | <b>83</b>  | 0,1885 | 0,307   |
| <b>33</b> | 0,1495 | 0,1225 | <b>84</b>  | 0,085  | 0,114   |
| <b>34</b> | 0,1175 | 0,259  | <b>85</b>  | 0,199  | 0,3345  |
| <b>35</b> | 0,1155 | 0,229  | <b>86</b>  | 0,3675 | 0,7015  |
| <b>36</b> | 0,1325 | 0,229  | <b>87</b>  | 0,2205 | 0,229   |
| <b>37</b> | 0,3725 | 0,3785 | <b>88</b>  | 0,191  | 0,149   |
| <b>38</b> | 0,0865 | 0,184  | <b>89</b>  | 0,109  | 0,2575  |
| <b>39</b> | 0,1785 | 0,333  | <b>90</b>  | 0,218  | 0,337   |
| <b>40</b> | 0,1205 | 0,191  | <b>91</b>  | 0,434  | 0,256   |
| <b>41</b> | 0,1675 | 0,257  | <b>92</b>  | 0,1715 | 0,2685  |
| <b>42</b> | 0,08   | 0,173  | <b>93</b>  | 0,226  | 0,2695  |
| <b>43</b> | 0,228  | 0,4535 | <b>94</b>  | 0,1635 | 0,71675 |
| <b>44</b> | 0,251  | 0,5235 | <b>95</b>  | 0,0665 | 0,206   |
| <b>45</b> | 0,186  | 0,4505 | <b>96</b>  | 0,3215 | 0,63175 |
| <b>46</b> | 0,207  | 0,839  | <b>97</b>  | 0,125  | 0,17775 |
| <b>47</b> | 0,167  | 0,2905 | <b>98</b>  | 0,2365 | 0,3735  |
| <b>48</b> | 0,1465 | 0,405  | <b>99</b>  | 0,1685 | 0,26    |
| <b>49</b> | 0,09   | 0,2465 | <b>100</b> | 0,212  | 0,3135  |
| <b>50</b> | 0,141  | 0,231  | <b>101</b> | 0,179  | 0,1655  |
| <b>51</b> | 0,201  | 0,161  |            |        |         |

\*Sample ID numbered from 01 to 32 and 33 to 101 indicated the original DENV positive serum and the original 69 DENV negative serum, respectively.
